# Supplementary material for: A facile route to prepare functional mesoporous organosilica spheres with electroactive units for chiral recognition of amino acids
Source: Royal Society of Chemistry journal article supplement (doi:10.1039/c8an01519h), 2018-10-25

## Supporting Information

### **A Facile Route to Prepare Functional Mesoporous Organosilica Spheres with Electroactive Units for Chiral Recognition of Amino Acids**

Datong Wu,<sup>a</sup> Wensheng Tan,<sup>b</sup> Hongda Li,<sup>b</sup> Zhangchen Lei,<sup>a</sup> Linhong Deng<sup>a</sup> and Yong Kong<sup>\*a</sup>

<sup>a</sup>Advanced Catalysis and Green Manufacturing Collaborative Innovation Center, School of Petrochemical Engineering, Changzhou University, Changzhou 213164, China

<sup>b</sup>Changzhou Key Laboratory of Large Plastic Parts Intelligence Manufacturing, Changzhou College of Information Technology, Changzhou, 213164, China

\*E-mail address: yzkongyong@126.com

$^1\text{H}$  NMR of (*S,S*)-2

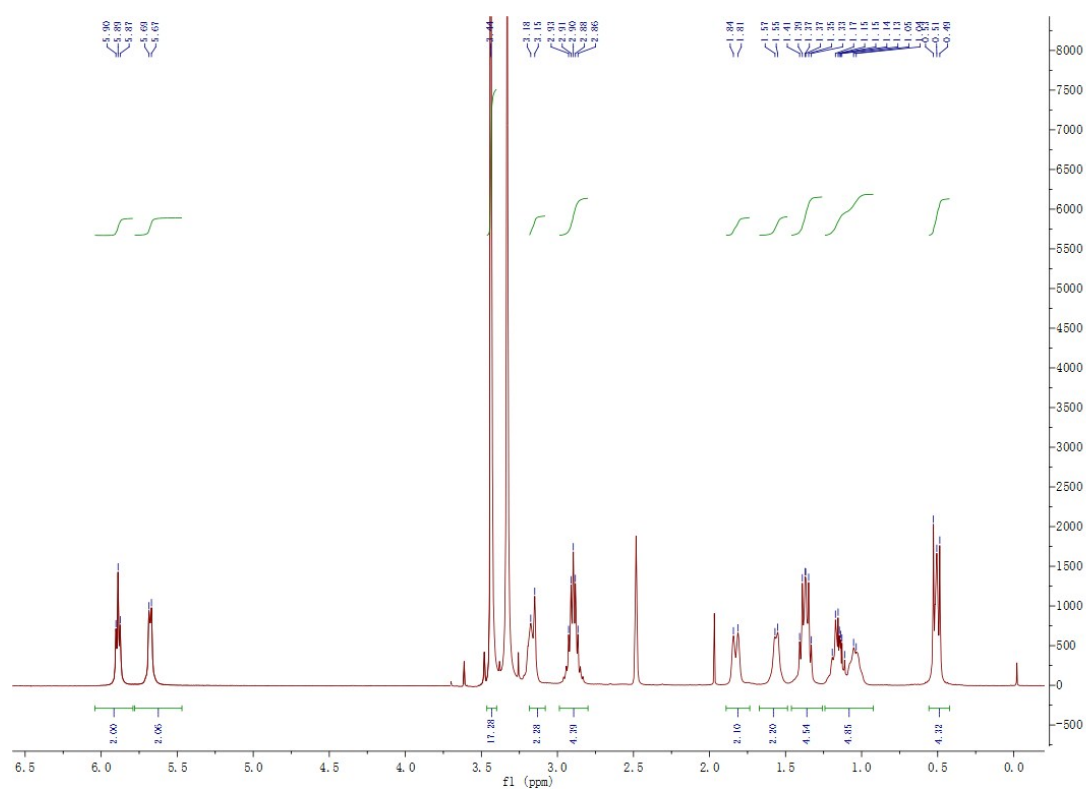

$^{13}\text{C}$  NMR of (*S,S*)-2

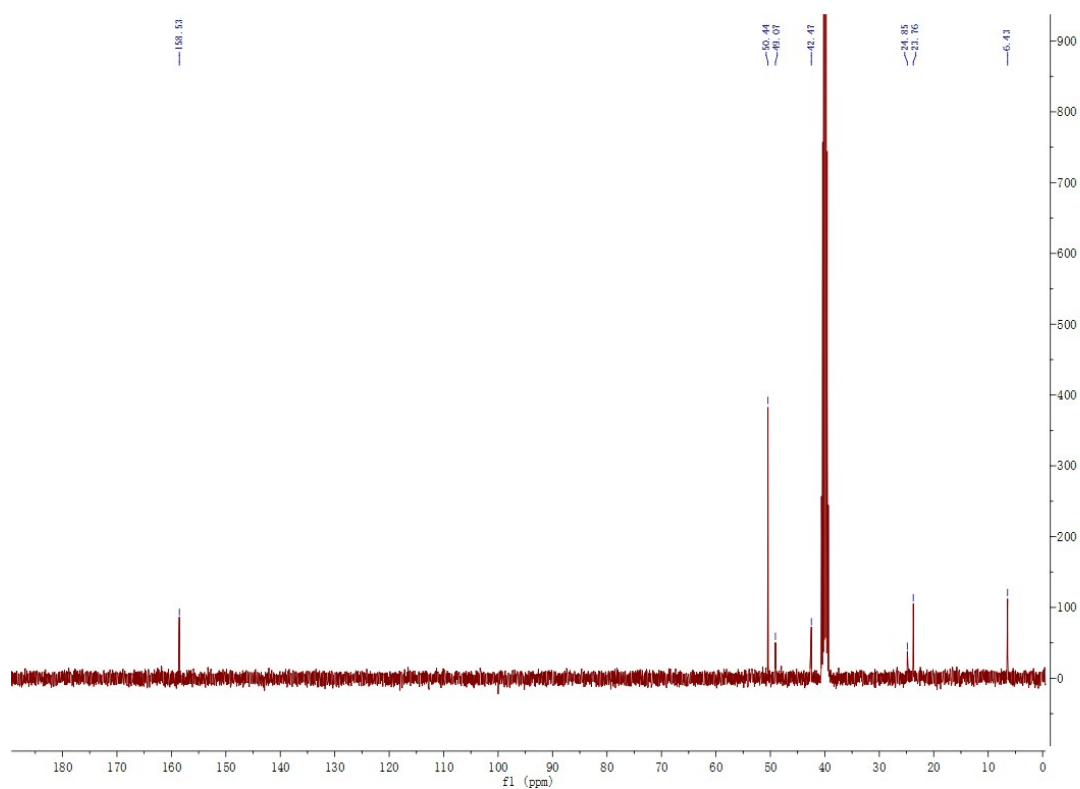

**Fig. S1** Powder X-ray diffraction pattern of (*S,S*)-CPMO-3

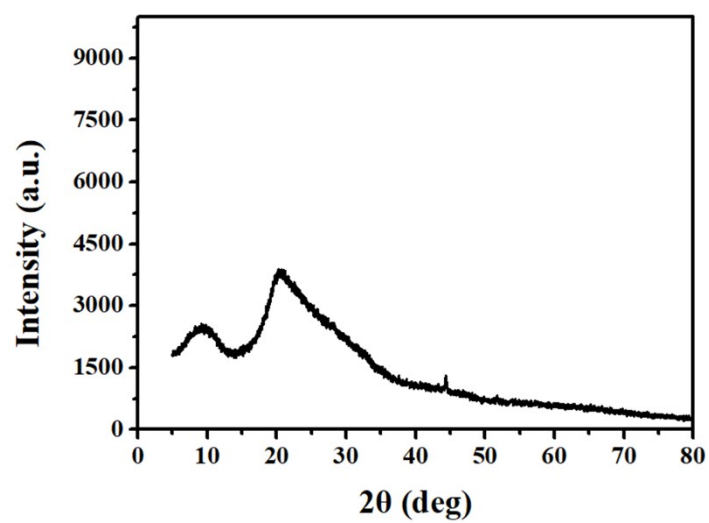

Supplement: c8an01519h1.pdf [file c8an01519h1.pdf]
